# Supplementary figures and images for: Thermoelectric properties of higher manganese silicide/multi-walled carbon nanotube composites
Source: Royal Society of Chemistry journal article supplement (doi:10.1039/c4dt01441c), 2014-01-01

Supplementary information

Powder X-ray diffraction pattern of a sample containing 0.1% of MWCNT.

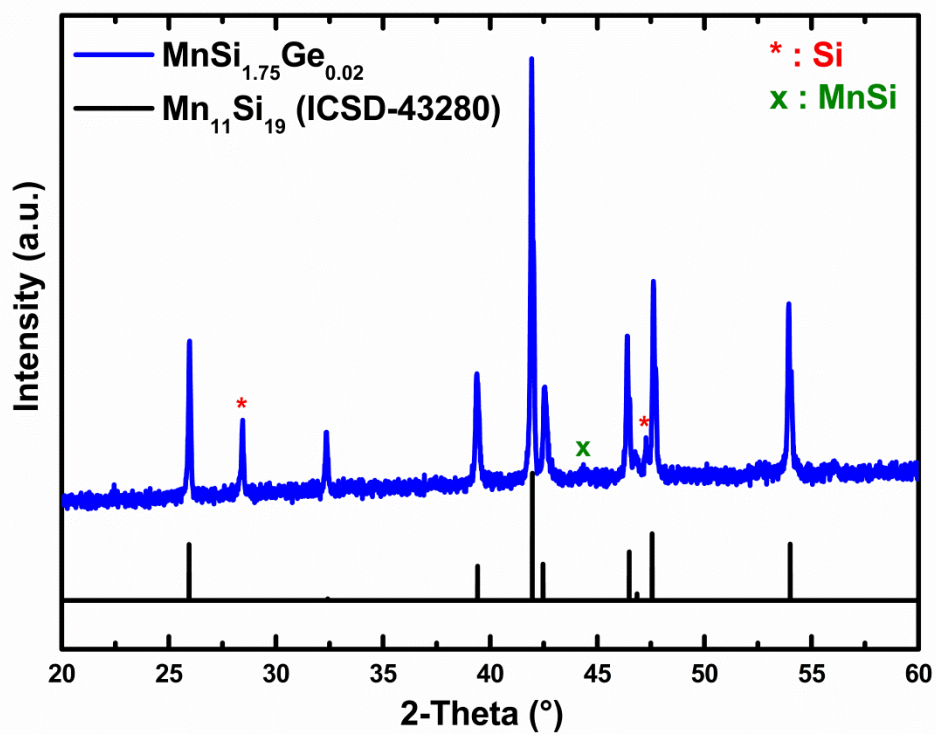

Supplement: c4dt01441c1.pdf [file c4dt01441c1.pdf]
